# Supplementary material for: Global FKRP Registry: observations in more than 300 patients with Limb Girdle Muscular Dystrophy R9
Source: PubMed Central journal article supplement (PMC7261761; doi:10.1002/acn3.51042), 2020-04-28
Supplement: ACN3-7-757-s001.pdf [file ACN3-7-757-s001.pdf]

| No. of patients | Nucleotide change - allele 1 | Effect on FKRP protein sequence 1 | Novel mutation - allele 1 | Nucleotide change - allele 2      | Effect on FKRP protein sequence 2         | Novel mutation - allele 2 |
|-----------------|------------------------------|-----------------------------------|---------------------------|-----------------------------------|-------------------------------------------|---------------------------|
| 206             | c.826C>A                     | p.Leu276Ile                       | No                        | c.826C>A                          | p.Leu276Ile                               | No                        |
| 1               | c.826C>A                     | p.Leu276Ile                       | No                        | c.826C>A<br>c.390insTACC          | p.Leu276Ile<br>p.Asp131TyrfsTer7          | No<br>Yes                 |
| 4               | c.826C>A                     | p.Leu276Ile                       | No                        | c.586G>C                          | p.Gly196Arg                               | No                        |
| 4               | c.826C>A                     | p.Leu276Ile                       | No                        | c.1384C>T                         | p.Pro462Ser                               | No                        |
| 4               | c.826C>A                     | p.Leu276Ile                       | No                        | c.1073C>T                         | p.Pro358Leu                               | No                        |
| 4               | c.826C>A                     | p.Leu276Ile                       | No                        | c.919T>A                          | p.Tyr307Asn                               | No                        |
| 3               | c.826C>A                     | p.Leu276Ile                       | No                        | c.229C>T                          | p.Gln77*                                  | Yes                       |
| 2               | c.826C>A                     | p.Leu276Ile                       | No                        | c.1187insA                        | p.Ala397Glyfs*67                          | No                        |
| 2               | c.826C>A                     | p.Leu276Ile                       | No                        | c.1486T>A                         | p.*496Argext*21                           | No                        |
| 2               | c.826C>A                     | p.Leu276Ile                       | No                        | c.962C>A                          | p.Ala321Glu                               | No                        |
| 2               | c.826C>A                     | p.Leu276Ile                       | No                        | c.1016G>A                         | p.Arg339His                               | No                        |
| 2               | c.826C>A                     | p.Leu276Ile                       | No                        | c.1088T>G                         | p.Val363Gly                               | Yes                       |
| 2               | c.826C>A                     | p.Leu276Ile                       | No                        | c.946C>T                          | p.Pro316Ser                               | No                        |
| 2               | c.826C>A                     | p.Leu276Ile                       | No                        | c.928G>T                          | p.Glu310*                                 | No                        |
| 2               | c.826C>A                     | p.Leu276Ile                       | No                        | c.469G>C                          | p.Ala157Pro                               | No                        |
| 2               | c.826C>A                     | p.Leu276Ile                       | No                        | c.532T>G                          | p.Trp178Gly                               | Yes                       |
| 2               | c.826C>A                     | p.Leu276Ile                       | No                        | c.646C>T                          | p.Arg216Trp                               | Yes                       |
| 2               | c.826C>A                     | p.Leu276Ile                       | No                        | c.545A>G                          | p.Tyr182Cys                               | No                        |
| 2               | c.826C>A                     | p.Leu276Ile                       | No                        | c.217C>T                          | p.Gln73*                                  | Yes                       |
| 1               | c.826C>A                     | p.Leu276Ile                       | No                        | c.1217A>C                         | p.Gln406Pro                               | Yes                       |
| 2               | c.826C>A                     | p.Leu276Ile                       | No                        | c.1054C>G                         | p.Arg352Gly                               | No                        |
| 1               | c.826C>A                     | p.Leu276Ile                       | No                        | c.1054C>T                         | p.Arg352Cys                               | No                        |
| 1               | c.826C>A                     | p.Leu276Ile                       | No                        | c.1054C>A                         | p.Arg352Ser                               | Yes                       |
| 1               | c.826C>A                     | p.Leu276Ile                       | No                        | c.673C>T                          | p.Gln225*                                 | Yes                       |
| 1               | c.826C>A                     | p.Leu276Ile                       | No                        | Not specified                     | Not specified                             | -                         |
| 1               | c.826C>A                     | p.Leu276Ile                       | No                        | c.1384C>T<br>c.341C>G             | p.Pro462Ser<br>p.Ala114Gly                | No<br>No                  |
| 1               | c.826C>A                     | p.Leu276Ile                       | No                        | c.341C>G                          | p.Ala114Gly                               | No                        |
| 1               | c.826C>A                     | p.Leu276Ile                       | No                        | c.135C>T<br>c.341C>G<br>c.1486T>A | p.Ala45Ala<br>p.Ala114Gly<br>p.Stop496Arg | No<br>No<br>No            |
| 1               | c.826C>A                     | p.Leu276Ile                       | No                        | c.426_437del                      | p.Arg143_Glu146del                        | No                        |
| 1               | c.826C>A                     | p.Leu276Ile                       | No                        | c.1037C>T                         | p.Ser346Leu                               | Yes                       |
| 1               | c.826C>A                     | p.Leu276Ile                       | No                        | c.1381G>C                         | p.Ala461Pro                               | Yes                       |
| 1               | c.826C>A                     | p.Leu276Ile                       | No                        | c.948_949dupC<br>c.1000_1017dup18 | p.Cys317Serfs*112<br>p.Glu334_Arg339dup   | Yes<br>No                 |
| 1               | c.826C>A                     | p.Leu276Ile                       | No                        | c.934C>G                          | p.Arg312Gly                               | Yes                       |
| 1               | c.826C>A                     | p.Leu276Ile                       | No                        | c.430A>G                          | p.Met144Val                               | No                        |
| 1               | c.826C>A                     | p.Leu276Ile                       | No                        | c.362T>A                          | p.Val121Glu                               | No                        |
| 1               | c.826C>A                     | p.Leu276Ile                       | No                        | c.398C>A                          | p.Ala133Glu                               | Yes                       |
| 1               | c.826C>A                     | p.Leu276Ile                       | No                        | c.1268G>C                         | p.Arg423Pro                               | No                        |
| 1               | c.826C>A                     | p.Leu276Ile                       | No                        | c.391G>A                          | p.Asp131Asn                               | Yes                       |
| 1               | c.826C>A                     | p.Leu276Ile                       | No                        | c.88C>T                           | p.Gln30*                                  | Yes                       |
| 1               | c.826C>A                     | p.Leu276Ile                       | No                        | c.214C>T                          | p.Gln72*                                  | No                        |
| 1               | c.826C>A                     | p.Leu276Ile                       | No                        | c.534G>T                          | p.Trp178Cys                               | Yes                       |
| 1               | c.826C>A                     | p.Leu276Ile                       | No                        | c.1000G>T                         | p.Glu334*                                 | Yes                       |
| 1               | c.826C>A                     | p.Leu276Ile                       | No                        | c.1433T>C                         | p.Ile478Thr                               | No                        |
| 1               | c.826C>A                     | p.Leu276Ile                       | No                        | c.605T>A                          | p.Leu202Gln                               | No                        |
| 1               | c.826C>A                     | p.Leu276Ile                       | No                        | c.620T>C                          | p.Leu207Pro                               | Yes                       |
| 1               | c.826C>A                     | p.Leu276Ile                       | No                        | c.872delA                         | p.Lys291Argfs*137                         | No                        |
| 1               | c.826C>A                     | p.Leu276Ile                       | No                        | c.943C>T                          | p.Pro315Leu                               | Yes                       |
| 1               | c.826C>A                     | p.Leu276Ile                       | No                        | c.946C>G<br>c.970G>C              | p.Pro316Ala<br>p.Glu324Gln                | Yes<br>Yes                |
| 1               | c.826C>A                     | p.Leu276Ile                       | No                        | c.836G>A                          | p.Trp279*                                 | No                        |
| 1               | c.826C>A                     | p.Leu276Ile                       | No                        | c.1076G>C                         | p.Trp359Ser                               | Yes                       |
| 1               | c.826C>A                     | p.Leu276Ile                       | No                        | c.899T>C                          | p.Val300Ala                               | No                        |
| 1               | c.826C>A                     | p.Leu276Ile                       | No                        | c.1253G>A                         | p.Trp418*                                 | No                        |
| 1               | c.826C>A                     | p.Leu276Ile                       | No                        | c.797insC                         | p.Ala267Glyfs*123                         | Yes                       |
| 1               | c.826C>A                     | p.Leu276Ile                       | No                        | c.158_162dupTGCGG                 | p.Glu55Cysfs*15                           | No                        |
| 1               | c.826C>A                     | p.Leu276Ile                       | No                        | c.162_165dupGGAG                  | p.Phe56Glyfs*6                            | No                        |
| 1               | c.826C>A                     | p.Leu276Ile                       | No                        | c.1171G>A                         | p.Gly391Ser                               | No                        |
| 1               | c.826C>A                     | p.Leu276Ile                       | No                        | c.76_77delTG                      | p.Trp26Alafs*6                            | No                        |
| 1               | c.826C>A                     | p.Leu276Ile                       | No                        | c.1115T>G                         | p.Val372Gly                               | No                        |
| 1               | c.826C>A                     | p.Leu276Ile                       | No                        | c.1141delG                        | p.Ala381Glnfs*47                          | No                        |
| 1               | c.826C>A                     | p.Leu276Ile                       | No                        | c.264C>G                          | p.Tyr88*                                  | No                        |
| 1               | c.826C>A                     | p.Leu276Ile                       | No                        | c.160C>G                          | p.Arg54Gly                                | Yes                       |
| 1               | c.826C>A                     | p.Leu276Ile                       | No                        | c.266C>T                          | p.Pro89Leu                                | No                        |
| 2               | c.1100T>C                    | p.Ile367Thr                       | No                        | c.1100T>C                         | p.Ile367Thr                               | No                        |
| 2               | c.1388A>G                    | p.Asn463Ser                       | Yes                       | c.162_165dupGGAG                  | p.Phe56Glyfs*6                            | No                        |
| 1               | c.1486T>A                    | p.*496Argext*21                   | No                        | c.1486T>A                         | p.*496Argext*21                           | No                        |
| 1               | c.1073C>T                    | p.Pro358Leu                       | No                        | c.1210C>T                         | p.Arg404Cys                               | No                        |
| 1               | c.265C>T                     | p.Pro89Ser                        | Yes                       | c.1433T>G                         | p.Ile478Ser                               | No                        |
| 1               | c.266C>T                     | p.Pro89Leu                        | No                        | c.1247A>G                         | p.Asp416Gly                               | Yes                       |
| 1               | c.430A>G                     | p.Met144Val                       | No                        | c.469G>C                          | p.Ala157Pro                               | No                        |
| 1               | c.520A>T                     | p.Ser174Cys                       | No                        | Not specified                     | Not specified                             | -                         |
| 1               | c.1343C>T                    | p.Pro448Leu                       | Yes                       | c.1387A>G                         | p.Gln460Glu                               | Yes                       |
