# Supplementary material for: Global FKRP Registry: observations in more than 300 patients with Limb Girdle Muscular Dystrophy R9
Source: PubMed Central journal article supplement (PMC7261761; doi:10.1002/acn3.51042), 2020-04-28
Supplement: ACN3-7-757-s002.pdf [file ACN3-7-757-s002.pdf]

| Clinical characteristics and demographics                                              | Patient Groups                                                            |                                                                             |                                                                             |                                                                           |                                                                          |                                                           |                                                                       |
|----------------------------------------------------------------------------------------|---------------------------------------------------------------------------|-----------------------------------------------------------------------------|-----------------------------------------------------------------------------|---------------------------------------------------------------------------|--------------------------------------------------------------------------|-----------------------------------------------------------|-----------------------------------------------------------------------|
|                                                                                        | Non-genetically confirmed patients                                        | All genetically confirmed patients                                          | All genetically confirmed LGMDR9 patients                                   | Homozygous common in LGMDR9                                               | Heterozygous common in LGMDR9                                            | Homozygous unique in LGMDR9                               | Heterozygous unique in LGMDR9                                         |
| Patients (n)                                                                           | 343                                                                       | 320                                                                         | -                                                                           | -                                                                         | -                                                                        | -                                                         | -                                                                     |
| Sex (f/m, n)                                                                           | 183/160                                                                   | 177/143                                                                     | -                                                                           | -                                                                         | -                                                                        | -                                                         | -                                                                     |
| LGMD R9 patients (n)                                                                   | -                                                                         | -                                                                           | 305                                                                         | 207                                                                       | 87                                                                       | 3                                                         | 8                                                                     |
| Sex (f/m, n)                                                                           | -                                                                         | -                                                                           | 168/137                                                                     | 117/90                                                                    | 45/42                                                                    | 1/2                                                       | 5/3                                                                   |
| <b>Diagnosis</b>                                                                       |                                                                           |                                                                             |                                                                             |                                                                           |                                                                          |                                                           |                                                                       |
| Mean age of genetically confirmed diagnosis (years $\pm$ SD, n) (at time of diagnosis) | -                                                                         | 29.9 $\pm$ 17.5 (259)<br>F(141): 30.8 $\pm$ 16.5<br>M(118): 29.0 $\pm$ 18.6 | 30.1 $\pm$ 17.3 (251)<br>F(138): 31.1 $\pm$ 16.4<br>M(113): 28.8 $\pm$ 18.3 | 34.8 $\pm$ 15.9 (164)<br>F(90): 35.1 $\pm$ 15.2<br>M(74): 34.5 $\pm$ 16.8 | 20.7 $\pm$ 16.5 (76)<br>F(42): 23.2 $\pm$ 16.2<br>M(34): 17.5 $\pm$ 16.5 | 19.2 $\pm$ 7.4 (3)<br>F(1): 17.6<br>M(2): 20.0 $\pm$ 10.3 | 26.1 $\pm$ 16.6 (8)<br>F(5): 29.3 $\pm$ 17.4<br>M(3): 20.7 $\pm$ 17.0 |
| <b>Disease onset</b>                                                                   |                                                                           |                                                                             |                                                                             |                                                                           |                                                                          |                                                           |                                                                       |
| Mean age of symptom onset (years $\pm$ SD, n)                                          | 9.0 $\pm$ 6.4 (4)<br>F(1): 7.0<br>M(3): 9.7 $\pm$ 7.6                     | 14.8 $\pm$ 12.3 (155)<br>F(88): 14.2 $\pm$ 11.0<br>M(67): 15.7 $\pm$ 13.9   | 15.1 $\pm$ 12.3 (152)<br>F(86): 14.5 $\pm$ 10.9<br>M(66): 15.9 $\pm$ 13.9   | 19.0 $\pm$ 12.4 (102)<br>F(61): 17.6 $\pm$ 10.6<br>M(41): 21.0 $\pm$ 14.5 | 6.8 $\pm$ 7.3 (44)<br>F(22): 6.4 $\pm$ 7.2<br>M(22): 7.2 $\pm$ 7.5       | 5.8 $\pm$ 0.4 (2)<br>F(1): 5.5<br>M(1): 6.0               | 12.0 $\pm$ 9.3 (4)<br>F(2): 12.5 $\pm$ 10.6<br>M(2): 11.5 $\pm$ 12.0  |
| <b>Presenting symptoms (occurring in &gt; 30% of all patients)</b>                     |                                                                           |                                                                             |                                                                             |                                                                           |                                                                          |                                                           |                                                                       |
| Weakness in lower limbs (f/m, n)                                                       | 3/3 (6)                                                                   | 64/45 (109)                                                                 | 63/44 (107)                                                                 | 47/28 (75)                                                                | 16/15 (31)                                                               | 0                                                         | 0/1 (1)                                                               |
| Weakness in lower limbs, mean age of onset (years $\pm$ SD, n)                         | 9.7 $\pm$ 7.6 (3)<br>F(0)<br>M(3): 9.7 $\pm$ 7.6                          | 16.9 $\pm$ 12.8 (103)<br>F(60): 16.4 $\pm$ 12.8<br>M(43): 17.6 $\pm$ 14.6   | 17.2 $\pm$ 12.8 (101)<br>F(59): 16.6 $\pm$ 12.8<br>M(42): 18.0 $\pm$ 14.5   | 21.2 $\pm$ 12.3 (71)<br>F(45): 19.4 $\pm$ 11.0<br>M(26): 24.3 $\pm$ 14.1  | 7.3 $\pm$ 7.8 (29)<br>F(14): 7.8 $\pm$ 8.6<br>M(15): 6.8 $\pm$ 7.2       | 0<br>F(0)<br>M(0)                                         | 20.0 (1)<br>F(0)<br>M(1): 20.0                                        |
| Proximal weakness (f/m, n)                                                             | 2/2 (4)                                                                   | 40/31 (71)                                                                  | 39/30 (69)                                                                  | 30/17 (47)                                                                | 7/10 (17)                                                                | 1/1 (2)                                                   | 1/2 (3)                                                               |
| Proximal weakness, mean age of onset (years $\pm$ SD, n)                               | 10.5 $\pm$ 10.6 (2)<br>F(0)<br>M(2): 10.5 $\pm$ 10.6                      | 17.5 $\pm$ 12.8 (65)<br>F(35): 18.0 $\pm$ 11.6<br>M(30): 17.0 $\pm$ 14.2    | 18.1 $\pm$ 12.6 (63)<br>F(34): 18.4 $\pm$ 11.4<br>M(29): 17.6 $\pm$ 14.1    | 22.3 $\pm$ 12.2 (43)<br>F(27): 21.5 $\pm$ 10.8<br>M(16): 23.7 $\pm$ 14.5  | 9.3 $\pm$ 8.4 (15)<br>F(5): 7.4 $\pm$ 3.5<br>M(10): 10.3 $\pm$ 10.0      | 5.8 $\pm$ 0.4 (2)<br>F(1): 6.0<br>M(1): 6.0               | 9.3 $\pm$ 9.3 (3)<br>F(1): 5.0<br>M(2): 11.5 $\pm$ 12.0               |
| Hyperckemia (f/m, n)                                                                   | 4/1 (5)                                                                   | 30/23 (53)                                                                  | 29/23 (52)                                                                  | 17/12 (29)                                                                | 9/10 (19)                                                                | 1/1 (2)                                                   | 2/0 (2)                                                               |
| Hyperckemia, mean age of onset (years $\pm$ SD, n)                                     | 12.5 $\pm$ 7.8 (2)<br>F(1): 7.0<br>M(1): 18.0                             | 10.8 $\pm$ 8.8 (50)<br>F(28): 11.3 $\pm$ 7.6<br>M(22): 10.2 $\pm$ 10.3      | 11.0 $\pm$ 8.8 (49)<br>F(27): 11.7 $\pm$ 7.6<br>M(22): 10.2 $\pm$ 10.3      | 14.6 $\pm$ 9.2 (27)<br>F(16): 15.0 $\pm$ 7.2<br>M(11): 13.9 $\pm$ 11.9    | 6.1 $\pm$ 5.9 (18)<br>F(8): 5.5 $\pm$ 3.5<br>M(10): 6.6 $\pm$ 7.4        | 5.8 $\pm$ 0.4 (2)<br>F(1): 5.5<br>M(1): 6.0               | 12.5 $\pm$ 10.6 (2)<br>F(2): 12.5 $\pm$ 10.6<br>M(0)                  |
| <b>Current motor function</b>                                                          |                                                                           |                                                                             |                                                                             |                                                                           |                                                                          |                                                           |                                                                       |
| Ambulant (+/- support) (f/m, n)                                                        | 129/105 (234)                                                             | 128/111 (239)                                                               | 123/106 (229)                                                               | 99/73 (169)                                                               | 23/30 (53)                                                               | 1/2 (3)                                                   | 3/1 (4)                                                               |
| Mean age of patients able to climb stairs (+/- support) (years $\pm$ SD, n)            | 36.8 $\pm$ 14.5 (78)<br>F(40): 36.0 $\pm$ 13.2<br>M(38): 37.7 $\pm$ 15.8  | 39.1 $\pm$ 15.0 (80)<br>F(45): 39.8 $\pm$ 17.5<br>M(35): 38.3 $\pm$ 13.8    | 39.3 $\pm$ 16.3 (77)<br>F(43): 40.1 $\pm$ 16.6<br>M(34): 38.2 $\pm$ 16.2    | 43.5 $\pm$ 14.6 (59)<br>F(37): 41.2 $\pm$ 16.1<br>M(22): 47.3 $\pm$ 10.9  | 25.5 $\pm$ 16.9 (15)<br>F(5): 35.1 $\pm$ 21.5<br>M(10): 20.6 $\pm$ 9.7   | 25.0 $\pm$ 6.0 (3)<br>F(1): 24.3<br>M(2): 25.4 $\pm$ 8.4  | 0<br>F(0)<br>M(0)                                                     |
| Mean age of patients able to walk (+/- support) (years $\pm$ SD, n)                    | 38.3 $\pm$ 16.1 (115)<br>F(68): 38.0 $\pm$ 16.0<br>M(47): 38.7 $\pm$ 16.5 | 44.9 $\pm$ 15.4 (116)<br>F(68): 44.9 $\pm$ 14.1<br>M(48): 45.0 $\pm$ 17.3   | 44.9 $\pm$ 15.1 (110)<br>F(66): 44.6 $\pm$ 14.2<br>M(44): 45.3 $\pm$ 16.7   | 47.0 $\pm$ 13.4 (82)<br>F(50): 45.5 $\pm$ 13.1<br>M(32): 49.5 $\pm$ 13.8  | 37.4 $\pm$ 18.7 (25)<br>F(14): 40.3 $\pm$ 18.0<br>M(11): 33.7 $\pm$ 19.8 | 0<br>F(0)<br>M(0)                                         | 49.5 $\pm$ 8.0 (3)<br>F(2): 53.8 $\pm$ 4.3<br>M(1): 40.9              |
| Non-ambulant (f/m, n)                                                                  | 43/38 (81)                                                                | 47/31 (78)                                                                  | 44/31 (75)                                                                  | 21/17 (38)                                                                | 21/12 (33)                                                               | 0                                                         | 2/2 (4)                                                               |
| Wheelchair use, part-time (f/m, n)                                                     | 42/27 (69)                                                                | 46/32 (78)                                                                  | 46/31 (77)                                                                  | 37/17 (54)                                                                | 8/13 (21)                                                                | 0                                                         | 1/1 (2)                                                               |
| Mean age of part-time wheelchair users (years $\pm$ SD, n)                             | 37.6 $\pm$ 16.5 (69)<br>F(42): 38.5 $\pm$ 16.7<br>M(27): 36.2 $\pm$ 16.4  | 39.9 $\pm$ 18.0 (78)<br>F(46): 41.4 $\pm$ 16.3<br>M(32): 37.9 $\pm$ 19.7    | 40.3 $\pm$ 17.6 (77)<br>F(46): 41.4 $\pm$ 16.3<br>M(31): 38.7 $\pm$ 19.5    | 45.8 $\pm$ 15.8 (54)<br>F(37): 43.6 $\pm$ 15.2<br>M(17): 50.5 $\pm$ 16.4  | 25.4 $\pm$ 13.6 (21)<br>F(8): 28.9 $\pm$ 16.6<br>M(13): 23.2 $\pm$ 11.6  | 0<br>F(0)<br>M(0)                                         | 48.9 $\pm$ 11.3 (2)<br>F(1): 56.8<br>M(1): 40.9                       |
| Wheelchair use, full-time (f/m, n)                                                     | 49/35 (84)                                                                | 52/28 (80)                                                                  | 49/28 (77)                                                                  | 23/15 (38)                                                                | 24/11 (35)                                                               | 0                                                         | 2/2 (4)                                                               |
| Mean age of full-time wheelchair users (years $\pm$ SD, n)                             | 40.2 $\pm$ 18.1 (84)<br>F(49): 37.2 $\pm$ 15.0<br>M(35): 44.2 $\pm$ 21.3  | 42.1 $\pm$ 16.4 (80)<br>F(52): 40.9 $\pm$ 16.2<br>M(28): 44.1 $\pm$ 16.8    | 42.5 $\pm$ 16.1 (77)<br>F(49): 41.5 $\pm$ 15.9<br>M(28): 44.1 $\pm$ 16.8    | 53.2 $\pm$ 12.7 (38)<br>F(23): 52.4 $\pm$ 12.9<br>M(15): 54.3 $\pm$ 12.6  | 32.6 $\pm$ 12.0 (35)<br>F(24): 31.5 $\pm$ 11.8<br>M(11): 34.8 $\pm$ 12.6 | 0<br>F(0)<br>M(0)                                         | 27.4 $\pm$ 10.2 (4)<br>F(2): 36.0 $\pm$ 3.9<br>M(2): 18.9 $\pm$ 2.2   |
| <b>Ventilation</b>                                                                     |                                                                           |                                                                             |                                                                             |                                                                           |                                                                          |                                                           |                                                                       |
| Non-invasive (f/m, n)                                                                  | 28/16 (44)                                                                | 32/17 (49)                                                                  | 30/16 (46)                                                                  | 20/11 (31)                                                                | 8/4 (12)                                                                 | 0                                                         | 2/1 (3)                                                               |
| Mean age of starting non-invasive ventilation (years $\pm$ SD, n)                      | 35.3 $\pm$ 14.0 (39)<br>F(24): 34.4 $\pm$ 12.9<br>M(15): 36.7 $\pm$ 15.9  | 39.4 $\pm$ 15.9 (42)<br>F(28): 39.9 $\pm$ 15.0<br>M(14): 38.4 $\pm$ 18.2    | 40.8 $\pm$ 15.0 (39)<br>F(26): 40.6 $\pm$ 14.9<br>M(13): 41.1 $\pm$ 15.7    | 46.6 $\pm$ 13.7 (24)<br>F(16): 45.5 $\pm$ 15.4<br>M(8): 48.8 $\pm$ 10.1   | 32.7 $\pm$ 13.2 (12)<br>F(8): 33.3 $\pm$ 11.9<br>M(4): 31.5 $\pm$ 17.3   | 0<br>F(0)<br>M(0)                                         | 26.6 $\pm$ 7.0 (3)<br>F(2): 30.5 $\pm$ 2.1<br>M(1): 18.8              |
| Invasive (f/m, n)                                                                      | 3/1 (4)                                                                   | 7/2 (9)                                                                     | 7/2 (9)                                                                     | 3/1 (4)                                                                   | 4/1 (5)                                                                  | 0                                                         | 0                                                                     |
| Mean age of starting invasive ventilation (years $\pm$ SD, n)                          | 27.5 $\pm$ 12.6 (4)<br>F(3): 23.1 $\pm$ 11.0<br>M(1): 40.8                | 43.1 $\pm$ 10.3 (6)<br>F(5): 43.9 $\pm$ 11.3<br>M(1): 39.0                  | 43.1 $\pm$ 10.3 (6)<br>F(5): 43.9 $\pm$ 11.3<br>M(1): 39.0                  | 62.0 (1)<br>F(1): 62.0<br>M(0)                                            | 39.3 $\pm$ 5.0 (5)<br>F(4): 39.4 $\pm$ 5.7<br>M(1): 39.0                 | 0<br>F(0)<br>M(0)                                         | 0<br>F(0)<br>M(0)                                                     |
